# Supplementary material for: Multi–Criteria–Decision–Analysis (MCDA) for the Horizon Scanning of Health Innovations an Application to COVID 19 Emergency
Source: MDPI journal article supplement (doi:10.3390/ijerph17217823), 2020-10-26
Supplement: s1 [file s1]

SUPPLEMENTARY MATERIALS

Supplementary Table S1. Scale and Shape parameters used in Monte Carlo Simulation

| Parameters | Economic criteria | Clinical criteria |
|------------|-------------------|-------------------|
| Scale      | 0,23              | 0,47              |
|            | 0,27              | 0,56              |
|            | 0,78              | 0,64              |
| Shape      | 1,31              | 0,58              |
|            | 0,63              | 0,84              |
|            | 1,46              | 1,19              |

Supplementary Figure S1. Individual virus protection device

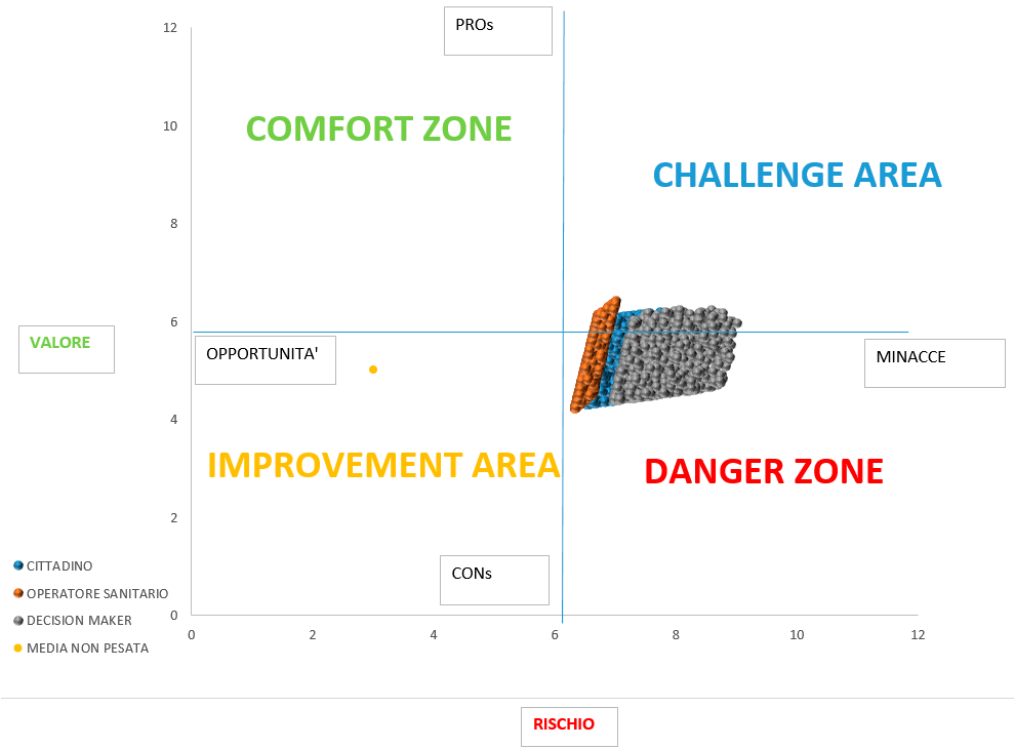

Supplementary Figure S2. Contact tracking device, Monte Carlo results

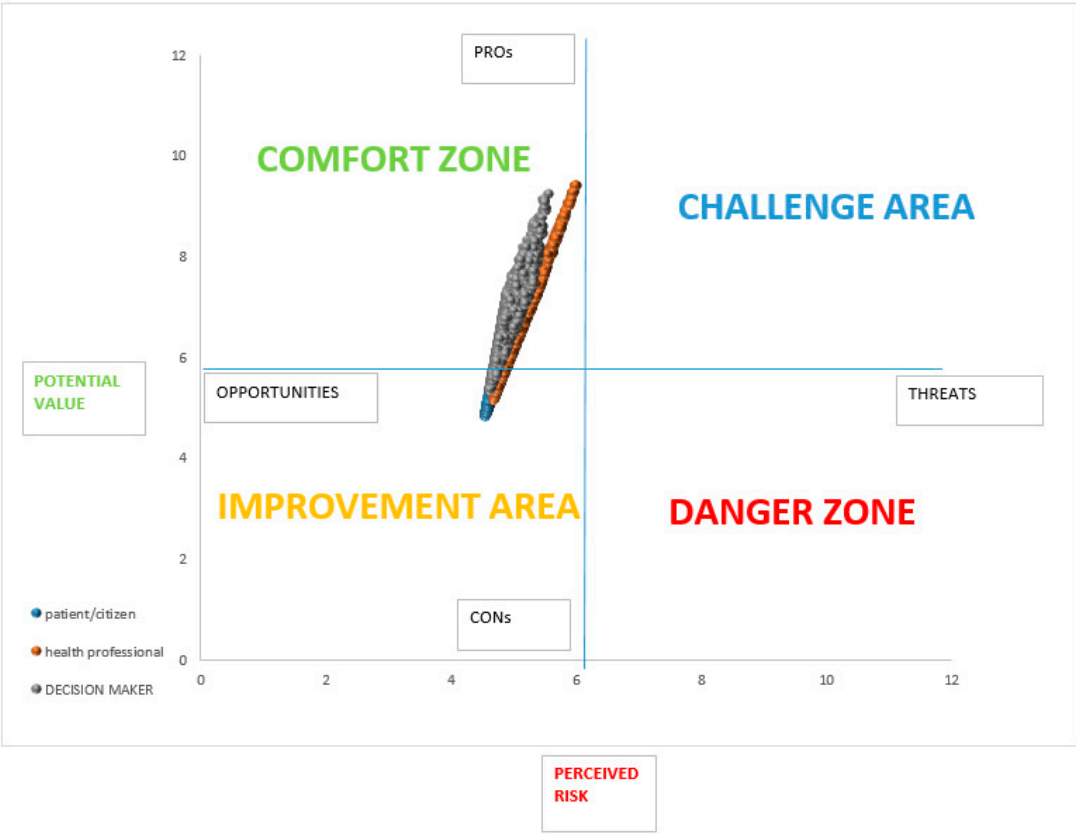



Supplementary Table S2. Individual virus protection apparatus, Potential Risk- Perceived Value matrix

| Domains                       | Pros                                                                                                                                                                                            | Cons                                                                                                                                                                                                                                          | Threats                                                                                                                                                                                                                                 | Opportunities                                                                                                             |
|-------------------------------|-------------------------------------------------------------------------------------------------------------------------------------------------------------------------------------------------|-----------------------------------------------------------------------------------------------------------------------------------------------------------------------------------------------------------------------------------------------|-----------------------------------------------------------------------------------------------------------------------------------------------------------------------------------------------------------------------------------------|---------------------------------------------------------------------------------------------------------------------------|
| <b>Effectiveness</b>          | <ul style="list-style-type: none"> <li>continuous monitoring of temperature</li> <li>integrated protection: mouth, nose and eyes</li> </ul>                                                     | <ul style="list-style-type: none"> <li>no back up in case of malfunctionings</li> <li>uncomfortable</li> </ul>                                                                                                                                | <ul style="list-style-type: none"> <li>stress of health professionals</li> </ul>                                                                                                                                                        | <ul style="list-style-type: none"> <li>chance of immediate actions in case of alert</li> <li>no need for masks</li> </ul> |
| <b>Safety</b>                 | <ul style="list-style-type: none"> <li>no need for filters (can cause damages and toxicities if substitution is delayed)</li> <li>no signs and bruises of health professionals faces</li> </ul> | <ul style="list-style-type: none"> <li>problems in wearing the devices in case of fire or other emergencies</li> <li>chance of fogging and scratching</li> </ul>                                                                              | <ul style="list-style-type: none"> <li>stress</li> <li>risk for health professionals health in case of evacuation (ie fire)</li> <li>chance of clinical errors iin case of scratching or fogging</li> </ul>                             | <ul style="list-style-type: none"> <li>social distancing is more fficient</li> </ul>                                      |
| <b>Organizational aspects</b> | <ul style="list-style-type: none"> <li>no need for breaks in order to measure and monitor temperaure</li> </ul>                                                                                 | <ul style="list-style-type: none"> <li>immediate action in case of alert challenging</li> <li>need for space to recharge batteries and store helmets</li> <li>need for personnel for sanification and substitution damaged helmets</li> </ul> | <ul style="list-style-type: none"> <li>risk of unjustified alters can decrease productivity and slow time to respnse during health emergencies</li> <li>stress and burn out due to continuous work and continuous monitoring</li> </ul> | <ul style="list-style-type: none"> <li>no breaks to measure temperature can increase efficiency</li> </ul>                |

|                                         |                                                                                                     |                                                                                                                                                                                                                                                                              |                                                                                                                                                                |                                                                                                                                                  |
|-----------------------------------------|-----------------------------------------------------------------------------------------------------|------------------------------------------------------------------------------------------------------------------------------------------------------------------------------------------------------------------------------------------------------------------------------|----------------------------------------------------------------------------------------------------------------------------------------------------------------|--------------------------------------------------------------------------------------------------------------------------------------------------|
| <b>Economic aspects</b>                 | <ul style="list-style-type: none"> <li>• multi-use device</li> <li>• multi-year mortgage</li> </ul> | <ul style="list-style-type: none"> <li>• not sure if useful after covid emergency</li> <li>• high cost due to energy sanitification, storage...</li> <li>• high opportunity costs if compared with other alternatives (i.e. temperature monitoring every 2 hours)</li> </ul> | <ul style="list-style-type: none"> <li>• waste of resources</li> <li>• not cost effective</li> <li>• increase of inefficiency of health expenditure</li> </ul> | <ul style="list-style-type: none"> <li>• costs can be partially compensated with the decrease of costs and space for storage of masks</li> </ul> |
| <b>Ethics, Social and legal aspects</b> | <ul style="list-style-type: none"> <li>• positive externality</li> </ul>                            | social <ul style="list-style-type: none"> <li>• stigma</li> <li>• disciplinary measures difficult to identify and to apply in case of non adherence</li> </ul>                                                                                                               | <ul style="list-style-type: none"> <li>• increase of stress due to stigma</li> </ul>                                                                           | <ul style="list-style-type: none"> <li>• positive signal and social commitment</li> </ul>                                                        |

Supplementary Table S3. Contact tracking device, Potential Risk – Perceived Value matrix

| Domains              | Pros                                                                                                                                                                                                                                                                                                                                                                    | Cons                                                                                                                                                                                                                                                                                                                                                     | Opportunities                                                                                                                      | Threats                                                                                                                                          |
|----------------------|-------------------------------------------------------------------------------------------------------------------------------------------------------------------------------------------------------------------------------------------------------------------------------------------------------------------------------------------------------------------------|----------------------------------------------------------------------------------------------------------------------------------------------------------------------------------------------------------------------------------------------------------------------------------------------------------------------------------------------------------|------------------------------------------------------------------------------------------------------------------------------------|--------------------------------------------------------------------------------------------------------------------------------------------------|
| <b>Effectiveness</b> | <ul style="list-style-type: none"> <li>• standard platforms needed</li> <li>• risk of contact is traced, not people</li> <li>• doesn't trace mobility on time</li> <li>• it uses the mobility history in order to predict contact</li> <li>• data already collected for other uses</li> <li>• doubles the chance of detecting infected compared to bluetooth</li> </ul> | <ul style="list-style-type: none"> <li>• effectiveness depends on the number of people using the technology</li> <li>• volunteering base</li> <li>• only IoT technology is allowed</li> <li>• available informative material is scarce</li> <li>• detecting range higher than bluetooth is not a necessity in order to reduce COVID contagion</li> </ul> | <ul style="list-style-type: none"> <li>• if massive use is achieved, lockdowns can be shorter</li> </ul>                           | <ul style="list-style-type: none"> <li>• low adherence</li> <li>• chance of biases in upgrading registers</li> </ul>                             |
| <b>Safety</b>        | <ul style="list-style-type: none"> <li>• anonymized data</li> <li>• encrypted data</li> </ul>                                                                                                                                                                                                                                                                           | <ul style="list-style-type: none"> <li>• private data management</li> </ul>                                                                                                                                                                                                                                                                              | <ul style="list-style-type: none"> <li>• users feel not to be surveilled</li> <li>• minimize risk of biased information</li> </ul> | <ul style="list-style-type: none"> <li>• excessive trust can bring to under-evaluation of non-mapped risks</li> <li>• risk of hackage</li> </ul> |

|                                         |                                                                                                                                                          |                                                                                                                                                                                                |                                                                                                                                                                                                    |                                                                                                                                                                         |
|-----------------------------------------|----------------------------------------------------------------------------------------------------------------------------------------------------------|------------------------------------------------------------------------------------------------------------------------------------------------------------------------------------------------|----------------------------------------------------------------------------------------------------------------------------------------------------------------------------------------------------|-------------------------------------------------------------------------------------------------------------------------------------------------------------------------|
|                                         |                                                                                                                                                          | <ul style="list-style-type: none"> <li>not clear compliance with GDPR</li> </ul>                                                                                                               |                                                                                                                                                                                                    |                                                                                                                                                                         |
| <b>Organizational aspects</b>           | <ul style="list-style-type: none"> <li>data storage with already existing technologies</li> <li>no need to download app</li> <li>fast upgrade</li> </ul> | <ul style="list-style-type: none"> <li>need to manage hackerages or malfunctioning</li> <li>volunteer base</li> <li>poor available informative matherial on functioning and safety.</li> </ul> | <ul style="list-style-type: none"> <li>Fast development and implementation</li> <li>technology available for massive use</li> </ul>                                                                | <ul style="list-style-type: none"> <li>patients not adherent</li> <li>malfunctioning can cause biases in thee contact tracing and increase of contagiousness</li> </ul> |
| <b>Econmics</b>                         | <ul style="list-style-type: none"> <li>affordable costs of implementation</li> <li>low manteinance costs</li> </ul>                                      | <ul style="list-style-type: none"> <li>need incentive to increase adherence</li> <li>not clear if use is free of charge</li> </ul>                                                             | <ul style="list-style-type: none"> <li>decrease of lockdwn duration</li> <li>increase of social welfare</li> </ul>                                                                                 | <ul style="list-style-type: none"> <li>if not free of charge chance of poor effectiveness and increase of inequalities</li> </ul>                                       |
| <b>Ethics, Social and Legal aspects</b> | <ul style="list-style-type: none"> <li>no surveillance on time</li> <li>no individual tracing</li> </ul>                                                 | <ul style="list-style-type: none"> <li>surveillance not completely avoided</li> <li>mapping of entire areas , stigma</li> <li>poor informative matherial available</li> </ul>                  | <ul style="list-style-type: none"> <li>incentive to social cooperation and commitment</li> <li>increase on capabilities</li> <li>chance of taking more informed and responsible choices</li> </ul> | <ul style="list-style-type: none"> <li>social stigma (entire areas or categories)</li> <li>inequalities increase if not free of charge</li> </ul>                       |
